# Supplementary material
Source: publisher figshare collection journal article supplement (https://tandf.figshare.com/ndownloader/files/22351863)
Supplement: Supplementary file 1 [file 22351863]

**Intracellular synthesis of gold nanoparticles by *Gluconacetobacter liquefaciens* for delivery of peptide CopA3 and ginsenoside and anti-inflammatory effect on lipopolysaccharide-activated macrophages**

Ying Liu1, Haribalan Perumalsamy1, Chang Ho Kang2, Seung Hyun Kim1, Jae-Sam Hwang3, Sung-Cheol Koh4, Tae-Hoo Yi1,2*, and Yeon-Ju Kim1,2*

*1Graduate School of Biotechnology, and College of Life Science, Kyung Hee University, Yongin-si, Gyeonggi-do, Republic of Korea*

*2Division of Applied Life Science and PMBBRC, Gyeongsang National University, 501 Jinju-daero, Jinju 660–701, Republic of Korea*

*3Department of Agricultural Biology, National Institute of Agricultural Sciences, Rural Development, Administration, Wanju, Republic of Korea*

*4Department of Environmental Engineering, Korea Maritime and Ocean University, Busan, Republic of Korea*

Correspondence authors: Yeon-Ju Kim; Tae-Hoo Yi

Tel +82-31-201-2645; Fax +82-31-204-8116

Email: [yeonjukim@khu.ac.kr](mailto:yeonjukim@khu.ac.kr) (YJ.K); drhoo@khu.ac.kr

**Supplementary Figure 1.** Identification of nanoparticle-producing strain. Neighbor-joining tree base on 16S rRNA gene sequence analysis showing relationships of *Gluconacetobacter liquefaciens* kh-1. The strain was identified as *Gluconacetobacter liquefaciens* IFO 12388 with high similarity (98%). The genetic variation, biochemical characteristics, and G+C mole% content (39.70 mol%) of the genomic DNA have been well characterized previously. Bootstrap values (>40%) on 1000 replications are shown at branching points. Scale bar, 0.005 substitutions per nucleotide position.


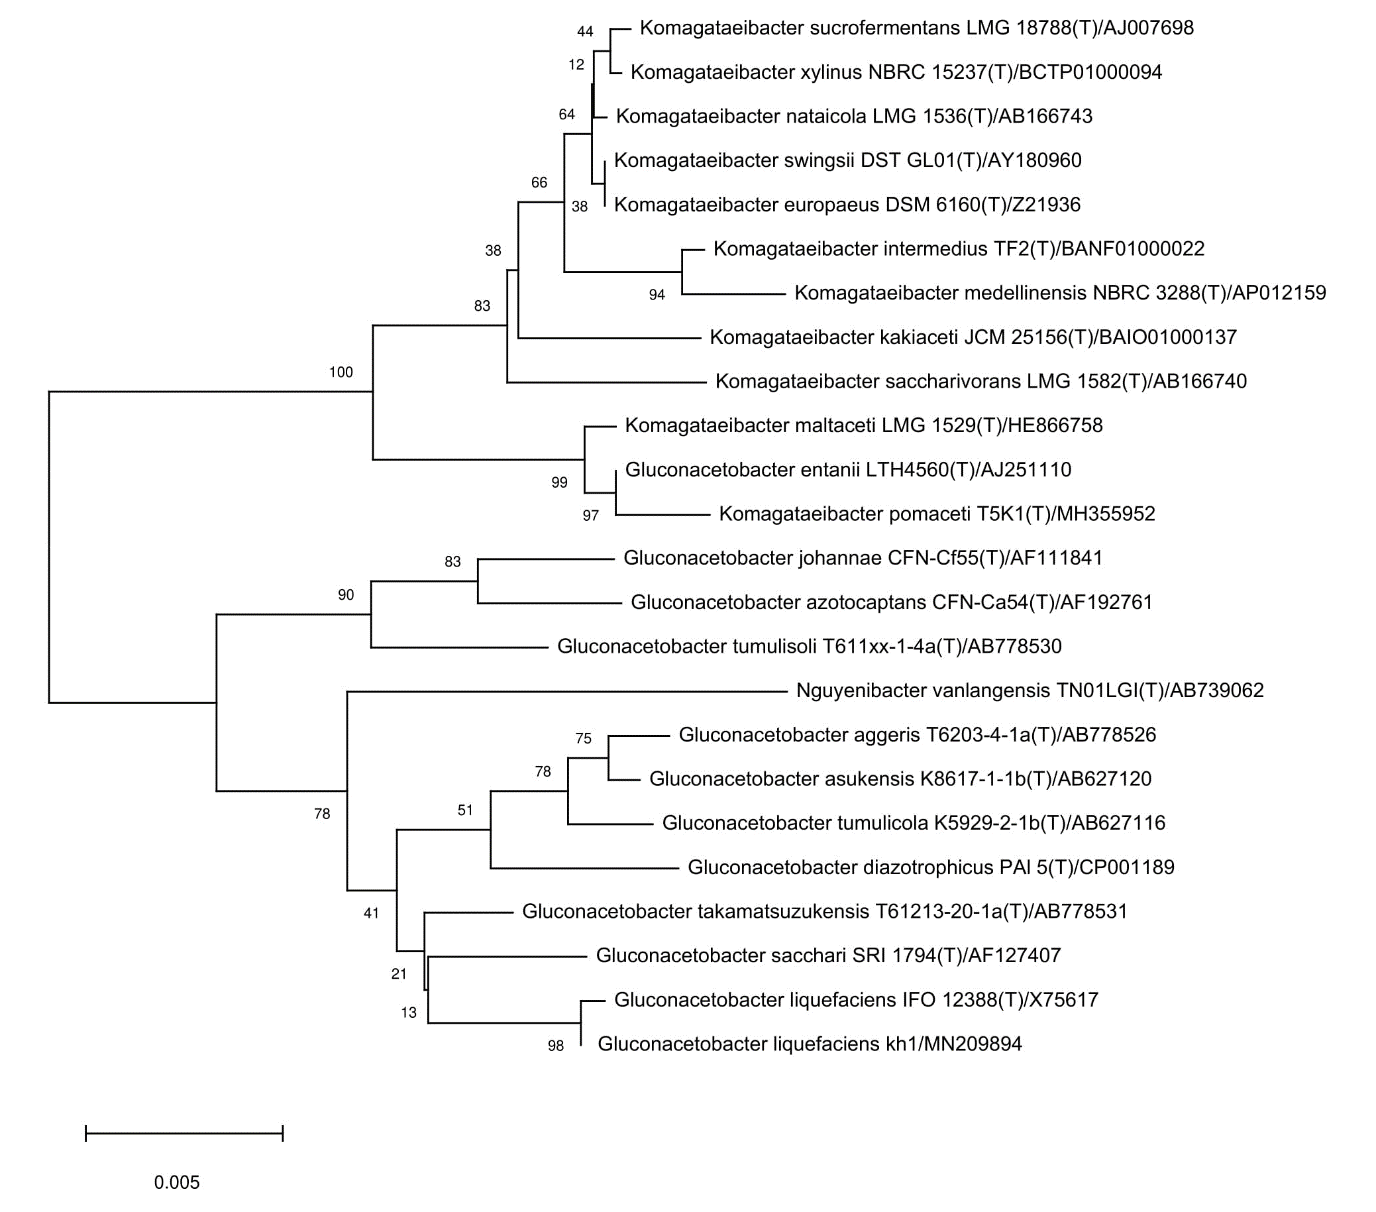


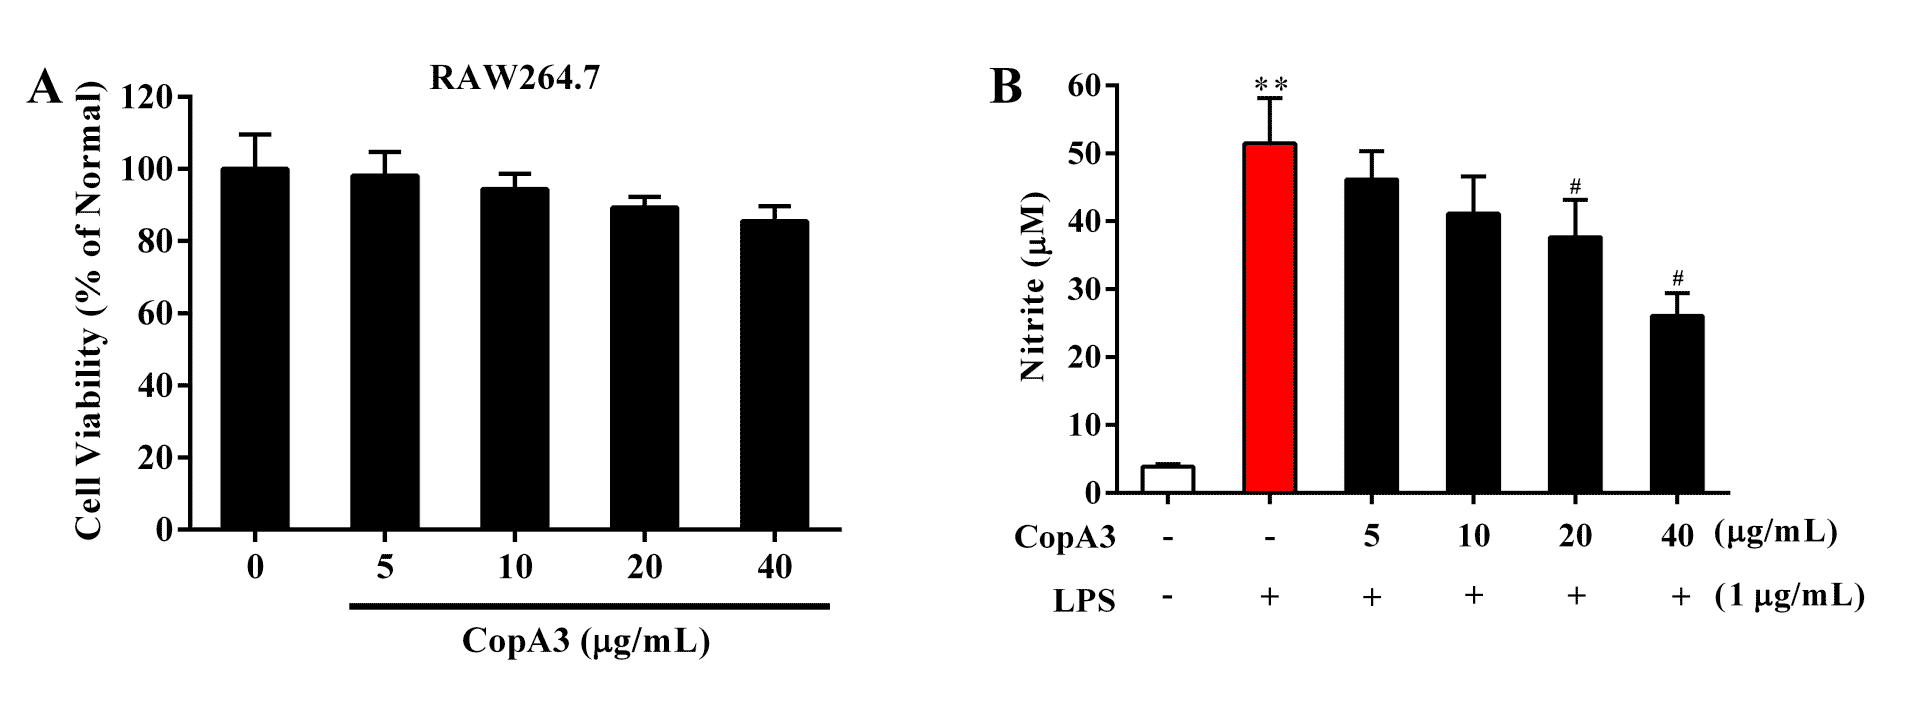


**Supplementary Figure 2.** Effect of CopA3 on cell viability and NO production in LPS-stimulated RAW264.7 cells. (A) Cell viability of RAW264.7 cells after 24 h incubation with different concentrations of CopA3 was determined by MTT assay. (B) NO production inhibition of CopA3 in LPS-induced RAW264.7 cells. Data are presented as mean ± SEM. ***p*<0.01 vs. normal control group; #*p*<0.05 and ##*p* < 0.01 vs. LPS-treated group.
